# Supplementary material for: Whistle characterization of long-beaked common dolphin (Delphinus delphis bairdii) in La Paz Bay, Gulf of California
Source: PeerJ. 2023 Jul 19;11:e15687. doi: 10.7717/peerj.15687 (PMC10362854; doi:10.7717/peerj.15687)
Supplement: Supplemental Information 2 [file peerj-11-15687-s002.xlsx]

## Sheet: Effort
Date	Duration (min)	Whistles	Group size	Group
2020-11-18	10	20	150	I
2020-11-18	10	10	150	I
2020-12-09	6	3	250	II
2020-12-09	10	11	250	II
2021-04-25	10	10	300	III
2021-04-25	10	3	80	IV
2021-09-07	5	5	140	V
2021-09-07	5	10	140	V
2021-09-07	10	88	140	V
2021-09-07	10	102	140	V
2021-09-07	8	8	140	V

## Sheet: Whistle parameters
Date (dd/mm/yyyy)	Sighting	File	ID	Individual name	Duration (s)	Maximum frequency (kHz)	Minimum frequency (kHz)	Frequency range (kHz)	Starting frequency (kHz)	Ending frequency (kHz)	Peak frequency (kHz)	Inflection points	Steps	Contour	Group size	Behavior	Group
2020-11-18	2	8	181120_8_10	Delphinus 18.11.2020 sig.2	0.410718	10.2061	6.62777	3.57834	10.2061	9.12836	7.33594	2	1	Concave	150	Traveling	I
2020-11-18	2	8	181120_8_12	Delphinus 18.11.2020 sig.2	0.714756	19.6466	10.5722	9.07444	19.6466	10.5722	12.8672	0	1	Downsweep	150	Traveling	I
2020-11-18	2	8	181120_8_131	Delphinus 18.11.2020 sig.2	1.12547	19.9373	8.96891	10.9684	8.96891	11.8552	13.3359	2	0	Convex	150	Traveling	I
2020-11-18	2	8	181120_8_14	Delphinus 18.11.2020 sig.2	0.72009	16.8147	10.1166	6.69811	16.521	11.016	11.8828	3	1	Sine	150	Traveling	I
2020-11-18	2	8	181120_8_147	Delphinus 18.11.2020 sig.2	0.944118	20.9579	9.40042	11.5575	9.40042	15.3966	12.5156	0	0	Upsweep	150	Traveling	I
2020-11-18	2	8	181120_8_160	Delphinus 18.11.2020 sig.2	0.512064	19.8205	13.9335	5.88704	13.9335	14.561	15.3516	1	0	Convex	150	Traveling	I
2020-11-18	2	8	181120_8_175	Delphinus 18.11.2020 sig.2	0.304038	15.4873	13.333	2.15432	14.2647	15.4873	13.6172	1	0	Constant Frequency	150	Traveling	I
2020-11-18	2	8	181120_8_20	Delphinus 18.11.2020 sig.2	0.314706	4.27881	3.0614	1.21741	3.1434	4.27881	3.67969	0	0	Constant Frequency	150	Traveling	I
2020-11-18	2	8	181120_8_240	Delphinus 18.11.2020 sig.2	0.842772	18.7448	9.04828	9.69652	9.04828	13.9335	17.8359	1	0	Convex	150	Traveling	I
2020-11-18	2	8	181120_8_255	Delphinus 18.11.2020 sig.2	1.12547	19.9373	11.7167	8.22053	15.4419	18.4716	11.7656	2	0	Sine	150	Traveling	I
2020-11-18	2	8	181120_8_288	Delphinus 18.11.2020 sig.2	0.325374	21.5826	11.4111	10.1715	14.1812	21.5826	11.5078	2	0	Concave	150	Traveling	I
2020-11-18	2	8	181120_8_29	Delphinus 18.11.2020 sig.2	0.805434	21.0814	7.81256	13.2688	21.0814	21.0814	8.57812	1	0	Concave	150	Traveling	I
2020-11-18	2	8	181120_8_318	Delphinus 18.11.2020 sig.2	0.688086	14.1396	3.78228	10.3573	3.78228	11.5121	12.6797	1	0	Convex	150	Traveling	I
2020-11-18	2	8	181120_8_343	Delphinus 18.11.2020 sig.2	0.618744	20.2917	11.0484	9.24335	11.2118	11.1461	14.0859	1	0	Convex	150	Traveling	I
2020-11-18	2	8	181120_8_36	Delphinus 18.11.2020 sig.2	0.325374	16.8147	12.721	4.09373	12.7959	15.0833	16.9219	1	0	Convex	150	Traveling	I
2020-11-18	2	8	181120_8_36.2	Delphinus 18.11.2020 sig.2	0.255984	16.8641	9.48361	7.38054	13.9745	9.48361	16.6406	1	0	Convex	150	Traveling	I
2020-11-18	2	8	181120_8_372	Delphinus 18.11.2020 sig.2	1.12014	15.4419	8.45728	6.98461	15.3966	8.45728	10.4297	6	0	Sine	150	Traveling	I
2020-11-18	2	8	181120_8_389	Delphinus 18.11.2020 sig.2	0.805434	18.635	10.3267	8.30832	10.3571	18.635	15.1875	0	1	Upsweep	150	Traveling	I
2020-11-18	2	8	181120_8_405	Delphinus 18.11.2020 sig.2	0.602742	21.2056	10.1762	11.0294	11.0484	21.2056	12.8203	1	0	Upsweep	150	Traveling	I
2020-11-18	2	8	181120_8_80	Delphinus 18.11.2020 sig.2	1.32817	18.2558	11.0484	7.20748	12.5355	18.2558	11.6719	1	0	Upsweep	150	Traveling	I
2020-11-18	2	9	181120_9_16.2	Delphinus 18.11.2020 sig.2	0.832104	11.8901	9.04828	2.84178	11.8901	9.6522	11.1328	2	0	Sine	150	Traveling	I
2020-11-18	2	9	181120_9_229	Delphinus 18.11.2020 sig.2	0.378714	17.0134	10.3267	6.68667	16.4242	17.0134	10.6875	1	0	Concave	150	Traveling	I
2020-11-18	2	9	181120_9_25	Delphinus 18.11.2020 sig.2	0.752094	14.0568	6.03326	8.02351	6.06881	14.0568	11.4844	0	1	Upsweep	150	Traveling	I
2020-11-18	2	9	181120_9_44	Delphinus 18.11.2020 sig.2	0.416052	15.4419	9.0749	6.36699	9.6239	15.4419	11.3672	1	0	Upsweep	150	Traveling	I
2020-11-18	2	9	181120_9_524	Delphinus 18.11.2020 sig.2	1.04546	22.2258	11.3776	10.8482	21.6461	19.3603	13.6406	1	0	Concave	150	Traveling	I
2020-11-18	2	9	181120_9_62	Delphinus 18.11.2020 sig.2	0.72009	13.1773	11.7167	1.46053	11.7512	12.8335	12.7031	0	0	Constant Frequency	150	Traveling	I
2020-11-18	2	9	181120_9_94	Delphinus 18.11.2020 sig.2	0.378714	17.6237	11.3776	6.24602	13.6901	17.6237	14.1094	0	1	Upsweep	150	Traveling	I
2020-11-18	2	9	181120_9_95	Delphinus 18.11.2020 sig.2	0.384048	19.0221	11.5121	7.51	13.7304	19.0221	14.25	4	0	Sine	150	Traveling	I
2020-11-18	2	9	181120_9_97	Delphinus 18.11.2020 sig.2	0.101346	21.6461	17.1639	4.48211	21.6461	19.2469	17.1562	2	0	Concave	150	Traveling	I
2020-11-18	2	9	181120_9_97.2	Delphinus 18.11.2020 sig.2	0.367977	18.0426	13.4905	4.5521	13.4905	18.0426	13.5	0	0	Upsweep	150	Traveling	I
2020-12-09	1	5	091220_5_222	Delphinus 09.12.2020 sig.1	0.272034	14.4757	8.35851	6.11722	14.4757	9.42807	14.3438	2	0	Sine	250	Traveling	II
2020-12-09	1	5	091220_5_42	Delphinus 09.12.2020 sig.1	0.176022	14.4757	12.7584	1.71735	14.4757	14.0568	12.8203	1	0	Concave	250	Traveling	II
2020-12-09	1	5	091220_5_77	Delphinus 09.12.2020 sig.1	0.896112	16.521	8.21251	8.30848	16.521	14.6038	13.2188	1	0	Concave	250	Traveling	II
2020-12-09	1	7	091220_7_112	Delphinus 09.12.2020 sig.1	0.784098	19.4743	9.53948	9.93483	19.4743	9.99843	10.9219	3	0	Sine	250	Traveling	II
2020-12-09	1	7	091220_7_170	Delphinus 09.12.2020 sig.1	0.837438	14.7764	9.96911	4.80728	10.5103	14.7764	10.0078	0	0	Constant Frequency	250	Traveling	II
2020-12-09	1	7	091220_7_171	Delphinus 09.12.2020 sig.1	0.336042	13.8519	8.60763	5.24424	9.23622	9.73762	9.89062	1	0	Convex	250	Traveling	II
2020-12-09	1	7	091220_7_259	Delphinus 09.12.2020 sig.1	0.8001	16.1374	7.07013	9.06723	16.1374	9.93988	11.6719	2	0	Sine	250	Traveling	II
2020-12-09	1	7	091220_7_298	Delphinus 09.12.2020 sig.1	0.88011	15.1722	7.15368	8.01849	7.45394	15.1722	10.0781	0	1	Upsweep	250	Traveling	II
2020-12-09	1	7	091220_7_317	Delphinus 09.12.2020 sig.1	0.864108	23.779	8.40775	15.3712	23.779	16.4242	9.11719	3	0	Concave	250	Traveling	II
2020-12-09	1	7	091220_7_318	Delphinus 09.12.2020 sig.1	0.752094	24.8499	10.2662	14.5837	24.5597	13.5302	15.8906	1	0	Concave	250	Traveling	II
2020-12-09	1	7	091220_7_543	Delphinus 09.12.2020 sig.1	0.608076	18.3095	9.15521	9.15433	12.4988	9.15521	13.3594	3	0	Convex	250	Traveling	II
2020-12-09	1	7	091220_7_66	Delphinus 09.12.2020 sig.1	0.16002	10.6033	6.56963	4.03368	6.56963	9.76626	9.67969	1	0	Upsweep	250	Traveling	II
2020-12-09	1	7	091220_7_69	Delphinus 09.12.2020 sig.1	0.784098	19.1904	4.61833	14.5721	5.22462	19.1904	11.7188	2	2	Sine	250	Traveling	II
2020-12-09	1	7	091220_7_83	Delphinus 09.12.2020 sig.1	1.10414	13.1773	5.28636	7.89091	5.28636	6.72581	5.74219	2	1	Sine	250	Traveling	II
2021-04-25	4	12	250421_12_108	Delphinus 25.04.2021 sig.4	0.384048	12.9091	7.02872	5.88041	7.11178	12.9091	13.5703	0	1	Upsweep	80	Traveling	IV
2021-04-25	4	12	250421_12_576	Delphinus 25.04.2021 sig.4	0.912114	9.42807	5.23999	4.18808	7.74402	5.23999	10.2656	1	0	Convex	80	Traveling	IV
2021-04-25	4	12	250421_12_8	Delphinus 25.04.2021 sig.4	0.77343	12.3528	8.1166	4.2362	12.3528	8.86417	11.1328	0	0	Downsweep	80	Traveling	IV
2021-04-25	3	8	250421_8_114	Delphinus 25.04.2021 sig. 3	0.618744	19.4172	5.07341	14.3438	5.07341	19.4172	11.2734	0	0	Upsweep	300	Feeding	III
2021-04-25	3	8	250421_8_182	Delphinus 25.04.2021 sig. 3	0.816102	15.7164	9.31796	6.39845	9.40042	14.2229	8.60156	0	1	Upsweep	300	Feeding	III
2021-04-25	3	8	250421_8_216	Delphinus 25.04.2021 sig. 3	0.778764	10.7918	6.24968	4.54212	6.24968	10.7918	9.23438	0	3	Upsweep	300	Feeding	III
2021-04-25	3	8	250421_8_259	Delphinus 25.04.2021 sig. 3	0.842772	10.4487	6.64726	3.80148	7.72131	10.4487	13.0078	2	1	Concave	300	Feeding	III
2021-04-25	3	8	250421_8_303	Delphinus 25.04.2021 sig. 3	0.842772	12.6465	7.5642	5.08226	7.5642	12.4988	10.9219	0	1	Upsweep	300	Feeding	III
2021-04-25	3	8	250421_8_314	Delphinus 25.04.2021 sig. 3	0.549402	13.4115	6.94664	6.46489	6.94664	13.216	9.09375	0	1	Upsweep	300	Feeding	III
2021-04-25	3	8	250421_8_315	Delphinus 25.04.2021 sig. 3	0.634746	13.4905	7.74402	5.74651	7.74402	12.3891	7.85156	1	1	Convex	300	Feeding	III
2021-04-25	3	8	250421_8_337	Delphinus 25.04.2021 sig. 3	0.922782	16.9137	8.28519	8.62856	8.58238	16.9137	12.5156	0	1	Upsweep	300	Feeding	III
2021-04-25	3	8	250421_8_417	Delphinus 25.04.2021 sig. 3	0.725424	15.1722	9.42807	5.7441	11.1461	15.1722	11.9297	1	2	Concave	300	Feeding	III
2021-04-25	3	8	250421_8_466	Delphinus 25.04.2021 sig. 3	0.810768	12.4256	8.86417	3.5614	8.86417	12.4256	13.2422	0	1	Upsweep	300	Feeding	III
2021-09-07	4	15	070921_15_116	Delphinus 07.09.2021 sig.4	0.602742	9.02175	7.43208	1.58967	7.47586	9.02175	8.34375	0	1	Upsweep	140	Traveling	V
2021-09-07	4	15	070921_15_118	Delphinus 07.09.2021 sig.4	0.816102	11.5121	7.1327	4.37939	7.1327	11.5121	8.03906	0	1	Upsweep	140	Traveling	V
2021-09-07	4	15	070921_15_120	Delphinus 07.09.2021 sig.4	0.90678	10.5722	6.64726	3.92495	6.64726	10.5722	8.27344	0	1	Upsweep	140	Traveling	V
2021-09-07	4	15	070921_15_134	Delphinus 07.09.2021 sig.4	0.341376	15.7626	12.1727	3.5899	15.3966	15.7626	12.375	1	1	Concave	140	Traveling	V
2021-09-07	4	15	070921_15_135	Delphinus 07.09.2021 sig.4	0.741426	18.8552	9.91073	8.94451	9.91073	18.7999	12.75	0	1	Upsweep	140	Traveling	V
2021-09-07	4	17	070921_17_2	Delphinus 07.09.2021 sig.4	0.421386	10.4181	7.00811	3.40999	8.18843	8.43248	9.70312	1	0	Convex	140	Traveling	V
2021-09-07	4	17	070921_17_215	Delphinus 07.09.2021 sig.4	0.416052	18.8552	11.8901	6.96517	18.7999	11.8901	16.3828	0	0	Downsweep	140	Traveling	V
2021-09-07	4	17	070921_17_22	Delphinus 07.09.2021 sig.4	0.517398	9.5115	8.48215	1.02935	8.5071	9.5115	8.97656	0	0	Constant Frequency	140	Traveling	V
2021-09-07	4	17	070921_17_222	Delphinus 07.09.2021 sig.4	0.554736	10.4181	6.62777	3.79033	9.53948	6.62777	9.63281	0	1	Downsweep	140	Traveling	V
2021-09-07	4	17	070921_17_225	Delphinus 07.09.2021 sig.4	0.69342	10.0573	6.12251	3.93482	7.1327	6.12251	10.0312	3	1	Convex	140	Traveling	V
2021-09-07	4	17	070921_17_237	Delphinus 07.09.2021 sig.4	0.24003	12.7584	11.3443	1.4141	11.5459	12.7584	11.5781	0	0	Constant Frequency	140	Traveling	V
2021-09-07	4	17	070921_17_268	Delphinus 07.09.2021 sig.4	0.501396	18.0957	8.02181	10.0739	18.0957	8.0454	9.5625	0	0	Downsweep	140	Traveling	V
2021-09-07	4	17	070921_17_280	Delphinus 07.09.2021 sig.4	0.688086	12.0306	7.19582	4.83475	12.0306	7.19582	9.84375	0	0	Downsweep	140	Traveling	V
2021-09-07	4	17	070921_17_50	Delphinus 07.09.2021 sig.4	0.752094	11.2448	9.4558	1.78897	9.99843	9.93988	9.5625	2	0	Sine	140	Traveling	V
2021-09-07	4	17	070921_17_9	Delphinus 07.09.2021 sig.4	0.330708	19.7624	8.45728	11.3051	12.1727	19.7624	8.76562	1	0	Concave	140	Traveling	V
2021-09-07	4	20	070921_20_10	Delphinus 07.09.2021 sig.4	0.357378	14.3487	5.39616	8.95259	7.00811	14.3487	9.46875	1	0	Concave	140	Traveling	V
2021-09-07	4	20	070921_20_110	Delphinus 07.09.2021 sig.4	0.314706	11.7858	7.5642	4.22157	10.5722	11.7858	11.3438	1	0	Concave	140	Traveling	V
2021-09-07	4	20	070921_20_115	Delphinus 07.09.2021 sig.4	0.138684	14.561	7.5199	7.0411	7.5199	14.561	11.6953	0	0	Upsweep	140	Traveling	V
2021-09-07	4	20	070921_20_119	Delphinus 07.09.2021 sig.4	0.954786	9.02175	6.32353	2.69822	6.32353	7.69867	6.77344	1	0	Upsweep	140	Traveling	V
2021-09-07	4	20	070921_20_121	Delphinus 07.09.2021 sig.4	0.304038	15.5329	5.80726	9.7256	5.80726	15.5329	11.7891	0	1	Upsweep	140	Traveling	V
2021-09-07	4	20	070921_20_122	Delphinus 07.09.2021 sig.4	0.197358	10.8554	7.32374	3.53164	7.32374	10.8554	8.13281	0	0	Upsweep	140	Traveling	V
2021-09-07	4	20	070921_20_125	Delphinus 07.09.2021 sig.4	0.837438	9.93988	6.10456	3.83532	6.10456	7.78964	9.70312	1	2	Convex	140	Traveling	V
2021-09-07	4	20	070921_20_126	Delphinus 07.09.2021 sig.4	0.074676	15.7626	12.3891	3.3735	15.7626	14.7764	12.3047	1	0	Concave	140	Traveling	V
2021-09-07	4	20	070921_20_128	Delphinus 07.09.2021 sig.4	0.13335	8.81226	8.21251	0.599744	8.45728	8.81226	8.4375	0	0	Constant Frequency	140	Traveling	V
2021-09-07	4	20	070921_20_137	Delphinus 07.09.2021 sig.4	1.37084	16.7654	5.01416	11.7512	5.01416	16.7654	11.7188	2	2	Sine	140	Traveling	V
2021-09-07	4	20	070921_20_141	Delphinus 07.09.2021 sig.4	0.256032	10.6345	6.78533	3.84916	10.2061	6.78533	8.08594	1	0	Downsweep	140	Traveling	V
2021-09-07	4	20	070921_20_150	Delphinus 07.09.2021 sig.4	0.096012	13.9335	10.3267	3.60676	13.9335	10.8873	12.3281	0	0	Downsweep	140	Traveling	V
2021-09-07	4	20	070921_20_172	Delphinus 07.09.2021 sig.4	0.277368	11.4447	6.26806	5.17661	11.4447	6.26806	7.05469	0	0	Downsweep	140	Traveling	V
2021-09-07	4	20	070921_20_172.2	Delphinus 07.09.2021 sig.4	0.789432	10.6345	7.47586	3.15863	10.6345	9.31796	8.15625	3	0	Sine	140	Traveling	V
2021-09-07	4	20	070921_20_173	Delphinus 07.09.2021 sig.4	0.384048	10.4181	5.54069	4.87741	10.4181	5.54069	8.01562	0	0	Downsweep	140	Traveling	V
2021-09-07	4	20	070921_20_175	Delphinus 07.09.2021 sig.4	0.192024	8.334	7.43208	0.901918	8.28519	7.43208	8.25	0	0	Constant Frequency	140	Traveling	V
2021-09-07	4	20	070921_20_197	Delphinus 07.09.2021 sig.4	0.298704	13.6499	4.20408	9.44587	4.20408	13.6499	10.0312	0	0	Upsweep	140	Traveling	V
2021-09-07	4	20	070921_20_199	Delphinus 07.09.2021 sig.4	0.128016	12.4256	8.55722	3.86835	8.55722	12.4256	9.11719	0	1	Upsweep	140	Traveling	V
2021-09-07	4	20	070921_20_201	Delphinus 07.09.2021 sig.4	0.768096	13.451	7.19582	6.25516	7.78964	13.0234	10.2188	0	1	Upsweep	140	Traveling	V
2021-09-07	4	20	070921_20_206	Delphinus 07.09.2021 sig.4	0.218694	14.4757	5.34883	9.1269	5.34883	14.4757	13.6875	0	0	Upsweep	140	Traveling	V
2021-09-07	4	20	070921_20_207	Delphinus 07.09.2021 sig.4	0.938784	14.6038	7.00811	7.59572	7.19582	14.0981	11.8828	0	2	Upsweep	140	Traveling	V
2021-09-07	4	20	070921_20_220	Delphinus 07.09.2021 sig.4	0.447972	9.20914	5.13336	4.07578	5.3175	9.18213	8.625	1	0	Upsweep	140	Traveling	V
2021-09-07	4	20	070921_20_220.2	Delphinus 07.09.2021 sig.4	0.18669	17.1639	12.2444	4.91951	15.1722	17.1639	12.4922	2	0	Concave	140	Traveling	V
2021-09-07	4	20	070921_20_225	Delphinus 07.09.2021 sig.4	0.234696	15.6703	12.4256	3.24475	14.4757	15.6703	13.7344	1	0	Concave	140	Traveling	V
2021-09-07	4	20	070921_20_230	Delphinus 07.09.2021 sig.4	0.122682	18.4716	15.4419	3.02967	16.1374	18.4716	16.0078	1	0	Concave	140	Traveling	V
2021-09-07	4	20	070921_20_234	Delphinus 07.09.2021 sig.4	0.069342	16.2324	12.8713	3.36114	13.2549	16.2324	14.9062	0	0	Upsweep	140	Traveling	V
2021-09-07	4	20	070921_20_238	Delphinus 07.09.2021 sig.4	0.090678	14.0981	9.73762	4.3605	9.79498	14.0981	10.4062	0	0	Upsweep	140	Traveling	V
2021-09-07	4	20	070921_20_240	Delphinus 07.09.2021 sig.4	0.10668	14.7331	9.96911	4.76395	9.96911	14.7331	11.6484	0	0	Upsweep	140	Traveling	V
2021-09-07	4	20	070921_20_243.2	Delphinus 07.09.2021 sig.4	0.256032	12.5355	10.5412	1.99432	12.5355	10.5722	10.7109	1	1	Downsweep	140	Traveling	V
2021-09-07	4	20	070921_20_251	Delphinus 07.09.2021 sig.4	0.181356	18.2558	14.2647	3.99113	18.2558	15.2168	16.0547	1	0	Downsweep	140	Traveling	V
2021-09-07	4	20	070921_20_253	Delphinus 07.09.2021 sig.4	0.88011	15.9958	6.68642	9.30938	15.9958	10.5103	6.77344	2	0	Downsweep	140	Traveling	V
2021-09-07	4	20	070921_20_259	Delphinus 07.09.2021 sig.4	0.730758	9.12836	6.72581	2.40255	9.12836	9.02175	6.89062	3	1	Sine	140	Traveling	V
2021-09-07	4	20	070921_20_26	Delphinus 07.09.2021 sig.4	0.336042	5.9628	5.39616	0.566644	5.39616	5.72261	5.85938	0	0	Constant Frequency	140	Traveling	V
2021-09-07	4	20	070921_20_27	Delphinus 07.09.2021 sig.4	0.24003	8.21251	6.68642	1.52609	8.21251	7.83553	7.17188	1	0	Concave	140	Traveling	V
2021-09-07	4	20	070921_20_271	Delphinus 07.09.2021 sig.4	0.928116	13.6901	6.58895	7.10115	13.6901	13.3722	8.88281	2	0	Concave	140	Traveling	V
2021-09-07	4	20	070921_20_274	Delphinus 07.09.2021 sig.4	0.101346	19.1342	10.5412	8.59295	10.5412	19.1342	13.0078	0	0	Upsweep	140	Traveling	V
2021-09-07	4	20	070921_20_278	Delphinus 07.09.2021 sig.4	0.069342	17.937	12.6465	5.29051	12.6465	17.937	14.8125	0	0	Upsweep	140	Traveling	V
2021-09-07	4	20	070921_20_278.2	Delphinus 07.09.2021 sig.4	0.05334	13.0234	12.137	0.886345	12.721	13.0234	12.2578	1	1	Concave	140	Traveling	V
2021-09-07	4	20	070921_20_29	Delphinus 07.09.2021 sig.4	0.458724	21.2056	7.67609	13.5295	7.72131	21.2056	11.9766	0	2	Upsweep	140	Traveling	V
2021-09-07	4	20	070921_20_292	Delphinus 07.09.2021 sig.4	0.234696	18.6898	5.45992	13.2299	5.47598	18.6898	14.625	0	3	Upsweep	140	Traveling	V
2021-09-07	4	20	070921_20_295	Delphinus 07.09.2021 sig.4	0.16002	14.0981	6.12251	7.97561	6.12251	14.0981	10.2422	0	0	Upsweep	140	Traveling	V
2021-09-07	4	20	070921_20_295.2	Delphinus 07.09.2021 sig.4	0.117348	10.3267	5.65578	4.67094	5.65578	10.3267	8.46094	0	0	Upsweep	140	Traveling	V
2021-09-07	4	20	070921_20_298	Delphinus 07.09.2021 sig.4	0.154686	15.9958	6.8857	9.1101	7.5199	15.9958	10.6172	0	0	Upsweep	140	Traveling	V
2021-09-07	4	20	070921_20_299	Delphinus 07.09.2021 sig.4	0.192024	16.8641	7.45394	9.41021	7.45394	16.8641	8.17969	0	0	Upsweep	140	Traveling	V
2021-09-07	4	20	070921_20_30	Delphinus 07.09.2021 sig.4	0.730758	16.3761	4.81218	11.5639	4.81218	16.3761	8.85938	0	1	Upsweep	140	Traveling	V
2021-09-07	4	20	070921_20_301	Delphinus 07.09.2021 sig.4	0.256032	11.1461	6.45488	4.69125	11.1461	6.45488	9.21094	0	0	Downsweep	140	Traveling	V
2021-09-07	4	20	070921_20_303	Delphinus 07.09.2021 sig.4	0.245364	10.8554	7.19582	3.65956	10.8554	7.19582	9.28125	0	0	Downsweep	140	Traveling	V
2021-09-07	4	20	070921_20_31	Delphinus 07.09.2021 sig.4	0.58674	8.6838	6.21308	2.47072	6.2865	7.90487	8.48438	1	0	Convex	140	Traveling	V
2021-09-07	4	20	070921_20_313	Delphinus 07.09.2021 sig.4	0.117348	13.9745	5.9105	8.06395	5.9105	13.9745	7.78125	1	1	Upsweep	140	Traveling	V
2021-09-07	4	20	070921_20_317	Delphinus 07.09.2021 sig.4	0.192024	14.3909	10.0869	4.30403	14.3909	12.721	11.3672	1	0	Concave	140	Traveling	V
2021-09-07	4	20	070921_20_318	Delphinus 07.09.2021 sig.4	0.138684	17.3668	10.6971	6.66963	11.7167	17.3668	13.7344	1	0	Upsweep	140	Traveling	V
2021-09-07	4	20	070921_20_318.2	Delphinus 07.09.2021 sig.4	0.16002	15.2615	9.59567	5.66588	9.85269	15.2615	9.91406	1	0	Upsweep	140	Traveling	V
2021-09-07	4	20	070921_20_320	Delphinus 07.09.2021 sig.4	0.304038	12.9471	7.65358	5.29352	10.0573	12.9471	7.66406	1	0	Concave	140	Traveling	V
2021-09-07	4	20	070921_20_325	Delphinus 07.09.2021 sig.4	0.170688	7.1327	5.65578	1.47692	5.72261	7.1327	5.71875	1	1	Concave	140	Traveling	V
2021-09-07	4	20	070921_20_336	Delphinus 07.09.2021 sig.4	0.650748	13.2939	7.65358	5.6403	9.53948	7.65358	8.0625	2	1	Sine	140	Traveling	V
2021-09-07	4	20	070921_20_342	Delphinus 07.09.2021 sig.4	0.730758	21.0196	10.0573	10.9622	19.9373	21.0196	11.5078	1	0	Concave	140	Traveling	V
2021-09-07	4	20	070921_20_351	Delphinus 07.09.2021 sig.4	0.21336	14.1396	7.85858	6.281	14.1396	12.6465	8.20312	2	0	Concave	140	Traveling	V
2021-09-07	4	20	070921_20_352	Delphinus 07.09.2021 sig.4	0.352044	11.5121	5.1033	6.40879	5.27086	11.5121	10.0781	0	1	Upsweep	140	Traveling	V
2021-09-07	4	20	070921_20_367	Delphinus 07.09.2021 sig.4	0.69342	10.4795	5.1033	5.37617	5.2093	6.23135	10.6172	2	1	Convex	140	Traveling	V
2021-09-07	4	20	070921_20_370	Delphinus 07.09.2021 sig.4	0.234696	21.3933	18.4716	2.92169	21.3933	19.3603	20.5547	2	0	Sine	140	Traveling	V
2021-09-07	4	20	070921_20_373	Delphinus 07.09.2021 sig.4	0.24003	11.311	7.41028	3.90073	7.47586	11.311	8.41406	0	1	Upsweep	140	Traveling	V
2021-09-07	4	20	070921_20_374	Delphinus 07.09.2021 sig.4	0.37338	22.2912	13.2939	8.99731	22.2912	15.5329	13.4766	1	1	Downsweep	140	Traveling	V
2021-09-07	4	20	070921_20_379	Delphinus 07.09.2021 sig.4	0.096012	14.5183	11.2118	3.30651	14.5183	12.2085	11.4375	1	1	Downsweep	140	Traveling	V
2021-09-07	4	20	070921_20_383	Delphinus 07.09.2021 sig.4	0.165354	16.328	5.39616	10.9319	5.50824	16.328	13.8516	0	0	Upsweep	140	Traveling	V
2021-09-07	4	20	070921_20_386	Delphinus 07.09.2021 sig.4	0.090678	12.6094	10.8873	1.72207	12.4256	10.8873	11.6016	0	0	Downsweep	140	Traveling	V
2021-09-07	4	20	070921_20_389	Delphinus 07.09.2021 sig.4	0.234696	3.52487	2.62012	0.904748	2.62012	3.27534	3	0	0	Constant Frequency	140	Traveling	V
2021-09-07	4	20	070921_20_39	Delphinus 07.09.2021 sig.4	0.608076	8.26089	7.1327	1.12819	7.1327	8.0454	7.99219	0	0	Constant Frequency	140	Traveling	V
2021-09-07	4	20	070921_20_390	Delphinus 07.09.2021 sig.4	0.154686	12.5724	9.4558	3.1166	12.5724	12.1727	9.51562	1	1	Concave	140	Traveling	V
2021-09-07	4	20	070921_20_391	Delphinus 07.09.2021 sig.4	0.08001	11.5459	9.6239	1.92205	11.5459	11.4111	10.0547	1	1	Concave	140	Traveling	V
2021-09-07	4	20	070921_20_42	Delphinus 07.09.2021 sig.4	0.90678	19.6466	7.78964	11.857	8.02181	9.56753	9.49219	2	1	Convex	140	Traveling	V
2021-09-07	4	20	070921_20_43	Delphinus 07.09.2021 sig.4	0.45339	16.6183	8.81226	7.80606	11.9601	16.6183	8.92969	1	2	Concave	140	Traveling	V
2021-09-07	4	20	070921_20_47	Delphinus 07.09.2021 sig.4	0.197358	14.3487	5.2093	9.13945	5.2554	14.3487	10.5703	0	1	Upsweep	140	Traveling	V
2021-09-07	4	20	070921_20_471	Delphinus 07.09.2021 sig.4	0.085344	18.7999	14.9072	3.89278	16.8147	18.7999	15.0938	2	1	Concave	140	Traveling	V
2021-09-07	4	20	070921_20_476	Delphinus 07.09.2021 sig.4	0.330708	14.5183	12.137	2.38127	12.1727	13.57	12.8672	1	0	Upsweep	140	Traveling	V
2021-09-07	4	20	070921_20_48	Delphinus 07.09.2021 sig.4	0.13335	15.9021	5.30191	10.6002	5.30191	15.9021	9.60938	0	0	Upsweep	140	Traveling	V
2021-09-07	4	20	070921_20_50	Delphinus 07.09.2021 sig.4	0.618744	11.3443	5.28636	6.05792	5.30191	9.79498	6.9375	2	2	Sine	140	Traveling	V
2021-09-07	4	20	070921_20_542	Delphinus 07.09.2021 sig.4	0.458724	12.4988	6.86551	5.63326	6.92627	12.4988	6.82031	0	1	Upsweep	140	Traveling	V
2021-09-07	4	20	070921_20_545	Delphinus 07.09.2021 sig.4	0.21336	10.6033	6.30499	4.29832	7.00811	10.6033	10.0781	1	0	Upsweep	140	Traveling	V
2021-09-07	4	20	070921_20_55	Delphinus 07.09.2021 sig.4	0.50673	14.3909	7.85858	6.53237	10.8873	14.2647	13.4062	1	1	Upsweep	140	Traveling	V
2021-09-07	4	20	070921_20_560	Delphinus 07.09.2021 sig.4	0.069342	9.40042	8.60763	0.792794	8.76065	9.31796	8.83594	1	0	Constant Frequency	140	Traveling	V
2021-09-07	4	20	070921_20_57	Delphinus 07.09.2021 sig.4	0.192024	12.2805	8.18843	4.09203	11.8901	12.2085	8.36719	1	1	Upsweep	140	Traveling	V
2021-09-07	4	20	070921_20_575	Delphinus 07.09.2021 sig.4	0.176022	9.70906	6.56963	3.13944	6.56963	9.70906	7.26562	1	0	Upsweep	140	Traveling	V
2021-09-07	4	20	070921_20_575.2	Delphinus 07.09.2021 sig.4	0.122682	9.91073	7.38855	2.52218	7.49785	9.88167	8.34375	1	1	Upsweep	140	Traveling	V
2021-09-07	4	20	070921_20_599	Delphinus 07.09.2021 sig.4	0.5334	10.2662	7.11178	3.15445	10.2061	7.11178	9.84375	0	0	Downsweep	140	Traveling	V
2021-09-07	4	20	070921_20_76	Delphinus 07.09.2021 sig.4	0.992124	17.0134	7.67609	9.33729	7.95144	17.0134	12.4453	3	1	Upsweep	140	Traveling	V
2021-09-07	4	20	070921_20_78	Delphinus 07.09.2021 sig.4	0.656082	22.0309	8.53212	13.4987	22.0309	19.1342	12.2812	1	0	Concave	140	Traveling	V
2021-09-07	4	20	070921_20_79	Delphinus 07.09.2021 sig.4	0.82677	19.1904	7.34528	11.8452	7.5642	18.6898	10.7109	0	1	Upsweep	140	Traveling	V
2021-09-07	4	20	070921_20_80	Delphinus 07.09.2021 sig.4	0.741426	13.7304	5.75632	7.97404	5.75632	12.9852	12.3047	0	3	Upsweep	140	Traveling	V
2021-09-07	4	22	070921_22_10	Delphinus 07.09.2021 sig.4	0.138684	10.5412	9.0749	1.46631	10.5412	10.4795	9.51562	1	0	Concave	140	Traveling	V
2021-09-07	4	22	070921_22_103	Delphinus 07.09.2021 sig.4	0.197358	13.451	9.04828	4.40269	13.451	12.5355	9.04688	1	0	Concave	140	Traveling	V
2021-09-07	4	22	070921_22_107	Delphinus 07.09.2021 sig.4	0.13335	11.3443	9.37285	1.97143	11.3443	9.99843	10.125	1	0	Concave	140	Traveling	V
2021-09-07	4	22	070921_22_113	Delphinus 07.09.2021 sig.4	0.77343	15.1277	6.66681	8.46087	11.614	15.1277	8.0625	2	1	Concave	140	Traveling	V
2021-09-07	4	22	070921_22_114	Delphinus 07.09.2021 sig.4	0.45339	16.7654	8.334	8.43139	16.7654	15.7164	9	1	1	Concave	140	Traveling	V
2021-09-07	4	22	070921_22_116	Delphinus 07.09.2021 sig.4	0.682752	26.1221	6.19486	19.9273	26.1221	9.02175	6.30469	3	1	Concave	140	Traveling	V
2021-09-07	4	22	070921_22_117	Delphinus 07.09.2021 sig.4	0.464058	12.3528	6.72581	5.62699	12.3528	6.72581	8.36719	0	0	Downsweep	140	Traveling	V
2021-09-07	4	22	070921_22_117.2	Delphinus 07.09.2021 sig.4	0.549402	14.0981	7.34528	6.75284	7.81256	14.0981	8.53125	0	0	Upsweep	140	Traveling	V
2021-09-07	4	22	070921_22_121	Delphinus 07.09.2021 sig.4	0.208026	18.1489	5.92788	12.221	5.92788	18.1489	12.6562	0	0	Upsweep	140	Traveling	V
2021-09-07	4	22	070921_22_121.2	Delphinus 07.09.2021 sig.4	0.501396	21.0814	8.5071	12.5743	21.0814	16.328	8.74219	1	0	Concave	140	Traveling	V
2021-09-07	4	22	070921_22_122	Delphinus 07.09.2021 sig.4	0.250698	17.8319	5.14846	12.6835	5.14846	17.8319	12.1172	0	1	Upsweep	140	Traveling	V
2021-09-07	4	22	070921_22_136	Delphinus 07.09.2021 sig.4	0.288036	14.0156	7.0494	6.96616	14.0156	9.59567	8.20312	1	0	Concave	140	Traveling	V
2021-09-07	4	22	070921_22_137	Delphinus 07.09.2021 sig.4	0.410718	11.8204	4.53767	7.28277	4.53767	11.8204	8.29688	0	1	Upsweep	140	Traveling	V
2021-09-07	4	22	070921_22_148	Delphinus 07.09.2021 sig.4	0.405384	14.0156	6.2865	7.72905	13.9745	10.6033	8.60156	1	0	Concave	140	Traveling	V
2021-09-07	4	22	070921_22_148.2	Delphinus 07.09.2021 sig.4	0.10668	14.7331	10.1463	4.58673	14.7331	10.2964	13.1016	1	0	Downsweep	140	Traveling	V
2021-09-07	4	22	070921_22_149	Delphinus 07.09.2021 sig.4	0.10668	14.6899	9.99843	4.69142	14.6899	10.4487	13.1016	1	0	Concave	140	Traveling	V
2021-09-07	4	22	070921_22_151	Delphinus 07.09.2021 sig.4	0.128016	12.3166	10.2662	2.05034	11.4447	12.3166	12.3516	1	0	Concave	140	Traveling	V
2021-09-07	4	22	070921_22_156	Delphinus 07.09.2021 sig.4	0.128016	13.1386	12.0306	1.10806	13.0234	13.1001	12.9141	0	0	Constant Frequency	140	Traveling	V
2021-09-07	4	22	070921_22_158	Delphinus 07.09.2021 sig.4	0.762762	14.561	8.76065	5.80035	14.561	12.2444	10.2891	2	0	Concave	140	Traveling	V
2021-09-07	4	22	070921_22_159	Delphinus 07.09.2021 sig.4	0.42672	13.8519	6.70608	7.14578	13.8519	10.6345	8.71875	1	0	Concave	140	Traveling	V
2021-09-07	4	22	070921_22_163	Delphinus 07.09.2021 sig.4	0.261366	13.7707	7.85858	5.91217	13.7707	13.4905	8.32031	1	0	Concave	140	Traveling	V
2021-09-07	4	22	070921_22_166	Delphinus 07.09.2021 sig.4	0.389382	15.7626	6.39826	9.36438	15.4419	6.41707	8.03906	2	0	Downsweep	140	Traveling	V
2021-09-07	4	22	070921_22_170	Delphinus 07.09.2021 sig.4	0.272034	14.4333	9.34537	5.08791	14.4333	9.40042	9.49219	1	0	Downsweep	140	Traveling	V
2021-09-07	4	22	070921_22_170.2	Delphinus 07.09.2021 sig.4	0.144018	10.0869	9.6522	0.434713	10.0869	9.88167	9.79688	0	0	Constant Frequency	140	Traveling	V
2021-09-07	4	22	070921_22_173	Delphinus 07.09.2021 sig.4	0.117348	8.70934	7.00811	1.70123	8.70934	8.53212	7.19531	1	0	Constant Frequency	140	Traveling	V
2021-09-07	4	22	070921_22_173.2	Delphinus 07.09.2021 sig.4	0.144018	12.9091	10.3875	2.52159	12.9091	12.5355	10.5938	1	0	Downsweep	140	Traveling	V
2021-09-07	4	22	070921_22_176	Delphinus 07.09.2021 sig.4	0.069342	10.2964	9.6239	0.672532	10.2964	9.6239	9.67969	1	0	Concave	140	Traveling	V
2021-09-07	4	22	070921_22_176.2	Delphinus 07.09.2021 sig.4	0.16002	8.53212	5.17879	3.35333	5.19402	8.53212	7.03125	1	0	Upsweep	140	Traveling	V
2021-09-07	4	22	070921_22_177	Delphinus 07.09.2021 sig.4	0.16002	10.6971	8.35851	2.33863	10.3875	10.6971	8.4375	1	0	Concave	140	Traveling	V
2021-09-07	4	22	070921_22_177.2	Delphinus 07.09.2021 sig.4	0.090678	7.7668	6.53115	1.23565	6.53115	7.7668	7.10156	0	0	Upsweep	140	Traveling	V
2021-09-07	4	22	070921_22_177.3	Delphinus 07.09.2021 sig.4	0.191988	14.9072	9.6522	5.25496	12.6094	14.9072	9.67969	1	0	Concave	140	Traveling	V
2021-09-07	4	22	070921_22_179	Delphinus 07.09.2021 sig.4	0.330708	11.2448	6.74559	4.49918	11.2448	11.2118	8.53125	1	0	Concave	140	Traveling	V
2021-09-07	4	22	070921_22_188	Delphinus 07.09.2021 sig.4	0.256032	13.9335	7.7668	6.16667	13.9335	12.2085	7.80469	1	0	Concave	140	Traveling	V
2021-09-07	4	22	070921_22_2	Delphinus 07.09.2021 sig.4	0.117348	11.2448	5.80726	5.43751	5.80726	11.2448	7.875	0	0	Upsweep	140	Traveling	V
2021-09-07	4	22	070921_22_200	Delphinus 07.09.2021 sig.4	0.517398	12.9091	11.2778	1.6313	12.066	12.2444	12.2344	1	0	Downsweep	140	Traveling	V
2021-09-07	4	22	070921_22_204	Delphinus 07.09.2021 sig.4	0.421386	13.333	5.89317	7.43982	13.333	8.81226	7.59375	1	0	Concave	140	Traveling	V
2021-09-07	4	22	070921_22_205	Delphinus 07.09.2021 sig.4	0.165354	15.0391	10.8554	4.1837	11.3443	15.0391	10.9688	2	0	Concave	140	Traveling	V
2021-09-07	4	22	070921_22_206	Delphinus 07.09.2021 sig.4	0.575964	13.6099	6.06881	7.54111	13.6099	10.1463	6.25781	1	2	Concave	140	Traveling	V
2021-09-07	4	22	070921_22_206.2	Delphinus 07.09.2021 sig.4	0.13335	13.0234	11.8204	1.20295	12.3528	13.0234	12.0469	0	0	Constant Frequency	140	Traveling	V
2021-09-07	4	22	070921_22_207	Delphinus 07.09.2021 sig.4	0.229362	12.2085	7.99828	4.21025	7.99828	12.2085	8.20312	1	1	Upsweep	140	Traveling	V
2021-09-07	4	22	070921_22_208	Delphinus 07.09.2021 sig.4	0.442722	15.4873	6.05101	9.4363	15.4873	10.0869	7.24219	1	2	Concave	140	Traveling	V
2021-09-07	4	22	070921_22_211	Delphinus 07.09.2021 sig.4	0.394716	13.2549	10.8235	2.43135	11.0809	13.2549	11.1328	0	0	Constant Frequency	140	Traveling	V
2021-09-07	4	22	070921_22_212	Delphinus 07.09.2021 sig.4	0.29337	13.5302	5.98034	7.54987	13.5302	12.2085	6.14062	1	1	Concave	140	Traveling	V
2021-09-07	4	22	070921_22_213	Delphinus 07.09.2021 sig.4	0.149352	12.3528	8.43248	3.92032	12.3528	10.8554	8.64844	1	0	Concave	140	Traveling	V
2021-09-07	4	22	070921_22_214	Delphinus 07.09.2021 sig.4	0.37338	14.3487	11.8552	2.49355	12.4988	14.3487	12.7266	2	0	Sine	140	Traveling	V
2021-09-07	4	22	070921_22_216	Delphinus 07.09.2021 sig.4	0.549402	12.9852	7.36688	5.6183	12.9852	8.73496	8.41406	3	0	Sine	140	Traveling	V
2021-09-07	4	22	070921_22_217	Delphinus 07.09.2021 sig.4	0.245364	13.4905	6.32353	7.167	13.4905	8.334	6.63281	1	1	Concave	140	Traveling	V
2021-09-07	4	22	070921_22_220	Delphinus 07.09.2021 sig.4	0.405384	16.0428	11.3443	4.69857	11.3443	16.0428	12.3047	2	0	Sine	140	Traveling	V
2021-09-07	4	22	070921_22_223	Delphinus 07.09.2021 sig.4	0.10668	14.2229	10.4795	3.74341	14.2229	13.7707	10.4062	1	0	Concave	140	Traveling	V
2021-09-07	4	22	070921_22_224	Delphinus 07.09.2021 sig.4	0.08001	12.8335	11.7167	1.11679	12.7959	12.8335	12.4219	1	0	Concave	140	Traveling	V
2021-09-07	4	22	070921_22_224.2	Delphinus 07.09.2021 sig.4	0.544068	14.7764	10.9193	3.85707	12.7959	14.7764	10.9453	1	1	Concave	140	Traveling	V
2021-09-07	4	22	070921_22_225	Delphinus 07.09.2021 sig.4	0.176022	12.5355	8.81226	3.72327	12.5355	11.7858	9.11719	1	0	Concave	140	Traveling	V
2021-09-07	4	22	070921_22_227	Delphinus 07.09.2021 sig.4	0.10668	12.1014	10.8873	1.21414	12.0306	12.066	11.2266	1	0	Concave	140	Traveling	V
2021-09-07	4	22	070921_22_23	Delphinus 07.09.2021 sig.4	0.917448	14.3909	6.76543	7.62552	6.84538	14.1396	10.0312	0	1	Upsweep	140	Traveling	V
2021-09-07	4	22	070921_22_235	Delphinus 07.09.2021 sig.4	0.282702	15.0833	12.0306	3.05275	12.0306	15.0833	12.9609	2	1	Sine	140	Traveling	V
2021-09-07	4	22	070921_22_241	Delphinus 07.09.2021 sig.4	0.522732	9.53948	5.08833	4.45114	9.53948	5.84147	8.53125	1	2	Downsweep	140	Traveling	V
2021-09-07	4	22	070921_22_243	Delphinus 07.09.2021 sig.4	0.474726	12.9852	10.4181	2.56709	12.9091	10.6033	10.7578	0	0	Downsweep	140	Traveling	V
2021-09-07	4	22	070921_22_244	Delphinus 07.09.2021 sig.4	1.02413	16.5696	7.74402	8.82556	7.99828	15.5785	10.4531	2	0	Upsweep	140	Traveling	V
2021-09-07	4	22	070921_22_247	Delphinus 07.09.2021 sig.4	0.138684	8.58238	7.32374	1.25864	7.32374	8.5071	7.19531	1	0	Upsweep	140	Traveling	V
2021-09-07	4	22	070921_22_247.2	Delphinus 07.09.2021 sig.4	0.234696	10.4487	7.36688	3.08186	7.36688	10.4487	7.38281	0	0	Upsweep	140	Traveling	V
2021-09-07	4	22	070921_22_251	Delphinus 07.09.2021 sig.4	0.192024	12.8335	7.60876	5.22477	10.9514	12.8335	8.0625	1	0	Concave	140	Traveling	V
2021-09-07	4	22	070921_22_254	Delphinus 07.09.2021 sig.4	0.181356	11.0484	8.38309	2.66527	11.0484	10.6971	8.29688	1	0	Concave	140	Traveling	V
2021-09-07	4	22	070921_22_255	Delphinus 07.09.2021 sig.4	0.40005	9.59567	9.15521	0.440469	9.18213	9.56753	9.75	0	0	Constant Frequency	140	Traveling	V
2021-09-07	4	22	070921_22_258	Delphinus 07.09.2021 sig.4	0.149352	9.12836	7.21698	1.91138	7.32374	9.12836	7.57031	0	1	Upsweep	140	Traveling	V
2021-09-07	4	22	070921_22_259	Delphinus 07.09.2021 sig.4	0.128016	9.37285	7.38855	1.9843	8.334	9.37285	8.20312	1	0	Concave	140	Traveling	V
2021-09-07	4	22	070921_22_260	Delphinus 07.09.2021 sig.4	0.085344	10.4181	7.85858	2.55952	7.90487	10.4181	7.89844	1	0	Concave	140	Traveling	V
2021-09-07	4	22	070921_22_263	Delphinus 07.09.2021 sig.4	0.544068	13.216	11.016	2.20007	12.9471	11.0484	12.7031	0	0	Downsweep	140	Traveling	V
2021-09-07	4	22	070921_22_265	Delphinus 07.09.2021 sig.4	0.629412	9.48361	7.97483	1.50878	9.48361	8.1166	8.22656	0	0	Constant Frequency	140	Traveling	V
2021-09-07	4	22	070921_22_268	Delphinus 07.09.2021 sig.4	0.208026	12.3166	7.65358	4.66299	7.65358	12.3166	8.39062	0	0	Upsweep	140	Traveling	V
2021-09-07	4	22	070921_22_271	Delphinus 07.09.2021 sig.4	0.554736	11.016	7.90487	3.11108	11.016	9.0749	8.78906	1	0	Concave	140	Traveling	V
2021-09-07	4	22	070921_22_274	Delphinus 07.09.2021 sig.4	0.698754	13.0234	7.58645	5.43693	8.14047	13.0234	7.75781	2	0	Sine	140	Traveling	V
2021-09-07	4	22	070921_22_276	Delphinus 07.09.2021 sig.4	0.24003	13.333	7.83553	5.49745	7.85858	13.333	8.39062	0	0	Upsweep	140	Traveling	V
2021-09-07	4	22	070921_22_276.2	Delphinus 07.09.2021 sig.4	0.496062	16.1848	10.6345	5.55033	12.8713	16.1848	10.7578	1	0	Concave	140	Traveling	V
2021-09-07	4	22	070921_22_279	Delphinus 07.09.2021 sig.4	0.13335	13.7707	11.0484	2.72239	12.1727	13.7707	12.0234	1	0	Concave	140	Traveling	V
2021-09-07	4	22	070921_22_282	Delphinus 07.09.2021 sig.4	0.656082	13.1386	10.6658	2.47286	11.8901	11.6481	10.8984	2	0	Sine	140	Traveling	V
2021-09-07	4	22	070921_22_284	Delphinus 07.09.2021 sig.4	0.528066	15.2615	10.8235	4.43801	13.4905	15.2615	11.6719	1	0	Concave	140	Traveling	V
2021-09-07	4	22	070921_22_286	Delphinus 07.09.2021 sig.4	0.645414	14.0568	7.78964	6.26713	8.78641	14.0568	7.85156	0	0	Constant Frequency	140	Traveling	V
2021-09-07	4	22	070921_22_294	Delphinus 07.09.2021 sig.4	0.122682	18.7448	14.3487	4.39606	14.6038	18.7448	14.4844	1	0	Upsweep	140	Traveling	V
2021-09-07	4	22	070921_22_297	Delphinus 07.09.2021 sig.4	0.096012	16.9635	13.4905	3.47296	13.4905	16.9635	14.7188	0	0	Upsweep	140	Traveling	V
2021-09-07	4	22	070921_22_30	Delphinus 07.09.2021 sig.4	0.138684	9.31796	6.2865	3.03146	6.55036	9.31796	7.17188	1	0	Upsweep	140	Traveling	V
2021-09-07	4	22	070921_22_30.2	Delphinus 07.09.2021 sig.4	0.672084	15.1722	7.58645	7.58572	15.1722	9.88167	11.7656	1	0	Downsweep	140	Traveling	V
2021-09-07	4	22	070921_22_301	Delphinus 07.09.2021 sig.4	0.314706	20.1729	13.1386	7.03424	13.5302	15.3515	14.0859	2	0	Convex	140	Traveling	V
2021-09-07	4	22	070921_22_367	Delphinus 07.09.2021 sig.4	0.064008	17.9897	13.9335	4.05626	13.9335	17.9897	15.3281	0	0	Upsweep	140	Traveling	V
2021-09-07	4	22	070921_22_37	Delphinus 07.09.2021 sig.4	0.77343	13.8519	6.72581	7.12606	13.8519	12.7584	6.98438	1	1	Concave	140	Traveling	V
2021-09-07	4	22	070921_22_391	Delphinus 07.09.2021 sig.4	0.421386	19.6466	11.8901	7.75658	18.0957	11.925	16.1719	1	0	Convex	140	Traveling	V
2021-09-07	4	22	070921_22_4	Delphinus 07.09.2021 sig.4	0.85344	17.8844	9.53948	8.34489	17.8844	17.572	10.7578	2	1	Concave	140	Traveling	V
2021-09-07	4	22	070921_22_5	Delphinus 07.09.2021 sig.4	0.117348	14.2647	11.1461	3.11858	14.2647	12.4988	11.3672	2	0	Concave	140	Traveling	V
2021-09-07	4	22	070921_22_5.2	Delphinus 07.09.2021 sig.4	2.1656	8.23667	4.92658	3.31009	6.24968	5.9105	8.27344	8	0	Sine	140	Traveling	V
2021-09-07	4	22	070921_22_5.3	Delphinus 07.09.2021 sig.4	0.368046	14.6038	9.04828	5.55554	14.6038	12.3166	11.5547	1	0	Downsweep	140	Traveling	V
2021-09-07	4	22	070921_22_52	Delphinus 07.09.2021 sig.4	0.29337	11.2118	6.94664	4.26516	11.2118	6.94664	8.53125	1	0	Downsweep	140	Traveling	V
2021-09-07	4	22	070921_22_59	Delphinus 07.09.2021 sig.4	0.144018	10.3267	8.38309	1.94362	8.40775	10.3267	8.34375	0	0	Upsweep	140	Traveling	V
2021-09-07	4	22	070921_22_65	Delphinus 07.09.2021 sig.4	0.256032	14.561	11.4447	3.11633	12.066	14.561	11.7656	0	3	Upsweep	140	Traveling	V
2021-09-07	4	22	070921_22_68	Delphinus 07.09.2021 sig.4	0.645414	11.2448	5.80726	5.43751	5.89317	11.2448	9.70312	0	0	Upsweep	140	Traveling	V
2021-09-07	4	22	070921_22_72	Delphinus 07.09.2021 sig.4	0.944118	16.9137	7.7668	9.14695	8.26089	16.9137	8.76562	1	0	Upsweep	140	Traveling	V
2021-09-07	4	22	070921_22_83	Delphinus 07.09.2021 sig.4	0.650748	18.9663	6.37949	12.5868	6.37949	18.9663	12.6797	0	2	Upsweep	140	Traveling	V
2021-09-07	4	22	070921_22_84	Delphinus 07.09.2021 sig.4	0.21336	14.3909	13.2939	1.09706	14.2229	14.3909	13.875	1	1	Concave	140	Traveling	V
2021-09-07	4	22	070921_22_85	Delphinus 07.09.2021 sig.4	0.522732	17.572	11.0484	6.52363	11.0484	17.5205	13.4766	0	1	Upsweep	140	Traveling	V
2021-09-07	4	22	070921_22_88	Delphinus 07.09.2021 sig.4	0.074676	14.6038	11.1461	3.4577	12.1014	14.6038	11.2266	1	0	Concave	140	Traveling	V
2021-09-07	4	22	070921_22_90	Delphinus 07.09.2021 sig.4	0.229362	10.7602	7.09092	3.66923	10.7602	7.09092	9.44531	0	0	Downsweep	140	Traveling	V
2021-09-07	4	22	070921_22_92	Delphinus 07.09.2021 sig.4	0.282702	12.4621	7.41028	5.05183	7.95144	12.4621	10.0078	2	0	Upsweep	140	Traveling	V
2021-09-07	4	22	070921_22_97	Delphinus 07.09.2021 sig.4	0.949452	14.7331	7.65358	7.07948	7.69867	13.8112	12.1641	2	1	Upsweep	140	Traveling	V
2021-09-07	4	22	070921_22_97.2	Delphinus 07.09.2021 sig.4	0.464058	12.137	4.47152	7.66551	4.47152	8.0928	11.7656	2	0	Convex	140	Traveling	V
2021-09-07	4	25	070921_25_0	Delphinus 07.09.2021 sig.4	0.634746	8.70934	4.76997	3.93937	8.60763	5.92788	8.74219	2	1	Concave	140	Traveling	V
2021-09-07	4	25	070921_25_100	Delphinus 07.09.2021 sig.4	0.389382	18.7999	4.19175	14.6082	4.19175	18.7999	7.26562	0	4	Upsweep	140	Traveling	V
2021-09-07	4	25	070921_25_100.2	Delphinus 07.09.2021 sig.4	0.192024	10.0278	4.52436	5.50348	4.52436	9.88167	8.15625	1	1	Upsweep	140	Traveling	V
2021-09-07	4	25	070921_25_105.2	Delphinus 07.09.2021 sig.4	0.16002	15.3515	7.28085	8.07061	7.30226	15.3515	7.73438	1	0	Upsweep	140	Traveling	V
2021-09-07	4	25	070921_25_20	Delphinus 07.09.2021 sig.4	0.8001	12.4988	6.37949	6.11927	8.73496	8.96891	11.625	2	0	Sine	140	Traveling	V
2021-09-07	4	25	070921_25_26	Delphinus 07.09.2021 sig.4	0.981456	12.6094	5.58972	7.01965	5.99793	9.04828	9.14062	2	0	Sine	140	Traveling	V
2021-09-07	4	25	070921_25_3	Delphinus 07.09.2021 sig.4	0.789432	13.9335	5.67241	8.26106	5.67241	8.55722	10.4766	2	0	Sine	140	Traveling	V
2021-09-07	4	25	070921_25_394	Delphinus 07.09.2021 sig.4	0.18669	7.78964	5.9628	1.82684	5.9628	7.78964	7.92188	0	0	Upsweep	140	Traveling	V

## Sheet: Permanova
Duration (s)	Maximum frequency (kHz)	Minimum frequency (kHz)	Frequency range (kHz)	Starting frequency (kHz)	Ending frequency (kHz)	Peak frequency (kHz)	Inflection points	Steps	Individual_name
0.410718	10.2061	6.62777	3.57834	10.2061	9.12836	7.33594	2	1	I
0.714756	19.6466	10.5722	9.07444	19.6466	10.5722	12.8672	0	1	I
1.12547	19.9373	8.96891	10.9684	8.96891	11.8552	13.3359	2	0	I
0.72009	16.8147	10.1166	6.69811	16.521	11.016	11.8828	3	1	I
0.944118	20.9579	9.40042	11.5575	9.40042	15.3966	12.5156	0	0	I
0.512064	19.8205	13.9335	5.88704	13.9335	14.561	15.3516	1	0	I
0.304038	15.4873	13.333	2.15432	14.2647	15.4873	13.6172	1	0	I
0.314706	4.27881	3.0614	1.21741	3.1434	4.27881	3.67969	0	0	I
0.842772	18.7448	9.04828	9.69652	9.04828	13.9335	17.8359	1	0	I
1.12547	19.9373	11.7167	8.22053	15.4419	18.4716	11.7656	2	0	I
0.325374	21.5826	11.4111	10.1715	14.1812	21.5826	11.5078	2	0	I
0.805434	21.0814	7.81256	13.2688	21.0814	21.0814	8.57812	1	0	I
0.688086	14.1396	3.78228	10.3573	3.78228	11.5121	12.6797	1	0	I
0.618744	20.2917	11.0484	9.24335	11.2118	11.1461	14.0859	1	0	I
0.325374	16.8147	12.721	4.09373	12.7959	15.0833	16.9219	1	0	I
0.255984	16.8641	9.48361	7.38054	13.9745	9.48361	16.6406	1	0	I
1.12014	15.4419	8.45728	6.98461	15.3966	8.45728	10.4297	6	0	I
0.805434	18.635	10.3267	8.30832	10.3571	18.635	15.1875	0	1	I
0.602742	21.2056	10.1762	11.0294	11.0484	21.2056	12.8203	1	0	I
1.32817	18.2558	11.0484	7.20748	12.5355	18.2558	11.6719	1	0	I
0.832104	11.8901	9.04828	2.84178	11.8901	9.6522	11.1328	2	0	I
0.378714	17.0134	10.3267	6.68667	16.4242	17.0134	10.6875	1	0	I
0.752094	14.0568	6.03326	8.02351	6.06881	14.0568	11.4844	0	1	I
0.416052	15.4419	9.0749	6.36699	9.6239	15.4419	11.3672	1	0	I
1.04546	22.2258	11.3776	10.8482	21.6461	19.3603	13.6406	1	0	I
0.72009	13.1773	11.7167	1.46053	11.7512	12.8335	12.7031	0	0	I
0.378714	17.6237	11.3776	6.24602	13.6901	17.6237	14.1094	0	1	I
0.384048	19.0221	11.5121	7.51	13.7304	19.0221	14.25	4	0	I
0.101346	21.6461	17.1639	4.48211	21.6461	19.2469	17.1562	2	0	I
0.367977	18.0426	13.4905	4.5521	13.4905	18.0426	13.5	0	0	I
0.272034	14.4757	8.35851	6.11722	14.4757	9.42807	14.3438	2	0	II
0.176022	14.4757	12.7584	1.71735	14.4757	14.0568	12.8203	1	0	II
0.896112	16.521	8.21251	8.30848	16.521	14.6038	13.2188	1	0	II
0.784098	19.4743	9.53948	9.93483	19.4743	9.99843	10.9219	3	0	II
0.837438	14.7764	9.96911	4.80728	10.5103	14.7764	10.0078	0	0	II
0.336042	13.8519	8.60763	5.24424	9.23622	9.73762	9.89062	1	0	II
0.8001	16.1374	7.07013	9.06723	16.1374	9.93988	11.6719	2	0	II
0.88011	15.1722	7.15368	8.01849	7.45394	15.1722	10.0781	0	1	II
0.864108	23.779	8.40775	15.3712	23.779	16.4242	9.11719	3	0	II
0.752094	24.8499	10.2662	14.5837	24.5597	13.5302	15.8906	1	0	II
0.608076	18.3095	9.15521	9.15433	12.4988	9.15521	13.3594	3	0	II
0.16002	10.6033	6.56963	4.03368	6.56963	9.76626	9.67969	1	0	II
0.784098	19.1904	4.61833	14.5721	5.22462	19.1904	11.7188	2	2	II
1.10414	13.1773	5.28636	7.89091	5.28636	6.72581	5.74219	2	1	II
0.384048	12.9091	7.02872	5.88041	7.11178	12.9091	13.5703	0	1	IV
0.912114	9.42807	5.23999	4.18808	7.74402	5.23999	10.2656	1	0	IV
0.77343	12.3528	8.1166	4.2362	12.3528	8.86417	11.1328	0	0	IV
0.618744	19.4172	5.07341	14.3438	5.07341	19.4172	11.2734	0	0	III
0.816102	15.7164	9.31796	6.39845	9.40042	14.2229	8.60156	0	1	III
0.778764	10.7918	6.24968	4.54212	6.24968	10.7918	9.23438	0	3	III
0.842772	10.4487	6.64726	3.80148	7.72131	10.4487	13.0078	2	1	III
0.842772	12.6465	7.5642	5.08226	7.5642	12.4988	10.9219	0	1	III
0.549402	13.4115	6.94664	6.46489	6.94664	13.216	9.09375	0	1	III
0.634746	13.4905	7.74402	5.74651	7.74402	12.3891	7.85156	1	1	III
0.922782	16.9137	8.28519	8.62856	8.58238	16.9137	12.5156	0	1	III
0.725424	15.1722	9.42807	5.7441	11.1461	15.1722	11.9297	1	2	III
0.810768	12.4256	8.86417	3.5614	8.86417	12.4256	13.2422	0	1	III
0.602742	9.02175	7.43208	1.58967	7.47586	9.02175	8.34375	0	1	V
0.816102	11.5121	7.1327	4.37939	7.1327	11.5121	8.03906	0	1	V
0.90678	10.5722	6.64726	3.92495	6.64726	10.5722	8.27344	0	1	V
0.341376	15.7626	12.1727	3.5899	15.3966	15.7626	12.375	1	1	V
0.741426	18.8552	9.91073	8.94451	9.91073	18.7999	12.75	0	1	V
0.421386	10.4181	7.00811	3.40999	8.18843	8.43248	9.70312	1	0	V
0.416052	18.8552	11.8901	6.96517	18.7999	11.8901	16.3828	0	0	V
0.517398	9.5115	8.48215	1.02935	8.5071	9.5115	8.97656	0	0	V
0.554736	10.4181	6.62777	3.79033	9.53948	6.62777	9.63281	0	1	V
0.69342	10.0573	6.12251	3.93482	7.1327	6.12251	10.0312	3	1	V
0.24003	12.7584	11.3443	1.4141	11.5459	12.7584	11.5781	0	0	V
0.501396	18.0957	8.02181	10.0739	18.0957	8.0454	9.5625	0	0	V
0.688086	12.0306	7.19582	4.83475	12.0306	7.19582	9.84375	0	0	V
0.752094	11.2448	9.4558	1.78897	9.99843	9.93988	9.5625	2	0	V
0.330708	19.7624	8.45728	11.3051	12.1727	19.7624	8.76562	1	0	V
0.357378	14.3487	5.39616	8.95259	7.00811	14.3487	9.46875	1	0	V
0.314706	11.7858	7.5642	4.22157	10.5722	11.7858	11.3438	1	0	V
0.138684	14.561	7.5199	7.0411	7.5199	14.561	11.6953	0	0	V
0.954786	9.02175	6.32353	2.69822	6.32353	7.69867	6.77344	1	0	V
0.304038	15.5329	5.80726	9.7256	5.80726	15.5329	11.7891	0	1	V
0.197358	10.8554	7.32374	3.53164	7.32374	10.8554	8.13281	0	0	V
0.837438	9.93988	6.10456	3.83532	6.10456	7.78964	9.70312	1	2	V
0.074676	15.7626	12.3891	3.3735	15.7626	14.7764	12.3047	1	0	V
0.13335	8.81226	8.21251	0.599744	8.45728	8.81226	8.4375	0	0	V
1.37084	16.7654	5.01416	11.7512	5.01416	16.7654	11.7188	2	2	V
0.256032	10.6345	6.78533	3.84916	10.2061	6.78533	8.08594	1	0	V
0.096012	13.9335	10.3267	3.60676	13.9335	10.8873	12.3281	0	0	V
0.277368	11.4447	6.26806	5.17661	11.4447	6.26806	7.05469	0	0	V
0.789432	10.6345	7.47586	3.15863	10.6345	9.31796	8.15625	3	0	V
0.384048	10.4181	5.54069	4.87741	10.4181	5.54069	8.01562	0	0	V
0.192024	8.334	7.43208	0.901918	8.28519	7.43208	8.25	0	0	V
0.298704	13.6499	4.20408	9.44587	4.20408	13.6499	10.0312	0	0	V
0.128016	12.4256	8.55722	3.86835	8.55722	12.4256	9.11719	0	1	V
0.768096	13.451	7.19582	6.25516	7.78964	13.0234	10.2188	0	1	V
0.218694	14.4757	5.34883	9.1269	5.34883	14.4757	13.6875	0	0	V
0.938784	14.6038	7.00811	7.59572	7.19582	14.0981	11.8828	0	2	V
0.447972	9.20914	5.13336	4.07578	5.3175	9.18213	8.625	1	0	V
0.18669	17.1639	12.2444	4.91951	15.1722	17.1639	12.4922	2	0	V
0.234696	15.6703	12.4256	3.24475	14.4757	15.6703	13.7344	1	0	V
0.122682	18.4716	15.4419	3.02967	16.1374	18.4716	16.0078	1	0	V
0.069342	16.2324	12.8713	3.36114	13.2549	16.2324	14.9062	0	0	V
0.090678	14.0981	9.73762	4.3605	9.79498	14.0981	10.4062	0	0	V
0.10668	14.7331	9.96911	4.76395	9.96911	14.7331	11.6484	0	0	V
0.256032	12.5355	10.5412	1.99432	12.5355	10.5722	10.7109	1	1	V
0.181356	18.2558	14.2647	3.99113	18.2558	15.2168	16.0547	1	0	V
0.88011	15.9958	6.68642	9.30938	15.9958	10.5103	6.77344	2	0	V
0.730758	9.12836	6.72581	2.40255	9.12836	9.02175	6.89062	3	1	V
0.336042	5.9628	5.39616	0.566644	5.39616	5.72261	5.85938	0	0	V
0.24003	8.21251	6.68642	1.52609	8.21251	7.83553	7.17188	1	0	V
0.928116	13.6901	6.58895	7.10115	13.6901	13.3722	8.88281	2	0	V
0.101346	19.1342	10.5412	8.59295	10.5412	19.1342	13.0078	0	0	V
0.069342	17.937	12.6465	5.29051	12.6465	17.937	14.8125	0	0	V
0.05334	13.0234	12.137	0.886345	12.721	13.0234	12.2578	1	1	V
0.458724	21.2056	7.67609	13.5295	7.72131	21.2056	11.9766	0	2	V
0.234696	18.6898	5.45992	13.2299	5.47598	18.6898	14.625	0	3	V
0.16002	14.0981	6.12251	7.97561	6.12251	14.0981	10.2422	0	0	V
0.117348	10.3267	5.65578	4.67094	5.65578	10.3267	8.46094	0	0	V
0.154686	15.9958	6.8857	9.1101	7.5199	15.9958	10.6172	0	0	V
0.192024	16.8641	7.45394	9.41021	7.45394	16.8641	8.17969	0	0	V
0.730758	16.3761	4.81218	11.5639	4.81218	16.3761	8.85938	0	1	V
0.256032	11.1461	6.45488	4.69125	11.1461	6.45488	9.21094	0	0	V
0.245364	10.8554	7.19582	3.65956	10.8554	7.19582	9.28125	0	0	V
0.58674	8.6838	6.21308	2.47072	6.2865	7.90487	8.48438	1	0	V
0.117348	13.9745	5.9105	8.06395	5.9105	13.9745	7.78125	1	1	V
0.192024	14.3909	10.0869	4.30403	14.3909	12.721	11.3672	1	0	V
0.138684	17.3668	10.6971	6.66963	11.7167	17.3668	13.7344	1	0	V
0.16002	15.2615	9.59567	5.66588	9.85269	15.2615	9.91406	1	0	V
0.304038	12.9471	7.65358	5.29352	10.0573	12.9471	7.66406	1	0	V
0.170688	7.1327	5.65578	1.47692	5.72261	7.1327	5.71875	1	1	V
0.650748	13.2939	7.65358	5.6403	9.53948	7.65358	8.0625	2	1	V
0.730758	21.0196	10.0573	10.9622	19.9373	21.0196	11.5078	1	0	V
0.21336	14.1396	7.85858	6.281	14.1396	12.6465	8.20312	2	0	V
0.352044	11.5121	5.1033	6.40879	5.27086	11.5121	10.0781	0	1	V
0.69342	10.4795	5.1033	5.37617	5.2093	6.23135	10.6172	2	1	V
0.234696	21.3933	18.4716	2.92169	21.3933	19.3603	20.5547	2	0	V
0.24003	11.311	7.41028	3.90073	7.47586	11.311	8.41406	0	1	V
0.37338	22.2912	13.2939	8.99731	22.2912	15.5329	13.4766	1	1	V
0.096012	14.5183	11.2118	3.30651	14.5183	12.2085	11.4375	1	1	V
0.165354	16.328	5.39616	10.9319	5.50824	16.328	13.8516	0	0	V
0.090678	12.6094	10.8873	1.72207	12.4256	10.8873	11.6016	0	0	V
0.234696	3.52487	2.62012	0.904748	2.62012	3.27534	3	0	0	V
0.608076	8.26089	7.1327	1.12819	7.1327	8.0454	7.99219	0	0	V
0.154686	12.5724	9.4558	3.1166	12.5724	12.1727	9.51562	1	1	V
0.08001	11.5459	9.6239	1.92205	11.5459	11.4111	10.0547	1	1	V
0.90678	19.6466	7.78964	11.857	8.02181	9.56753	9.49219	2	1	V
0.45339	16.6183	8.81226	7.80606	11.9601	16.6183	8.92969	1	2	V
0.197358	14.3487	5.2093	9.13945	5.2554	14.3487	10.5703	0	1	V
0.085344	18.7999	14.9072	3.89278	16.8147	18.7999	15.0938	2	1	V
0.330708	14.5183	12.137	2.38127	12.1727	13.57	12.8672	1	0	V
0.13335	15.9021	5.30191	10.6002	5.30191	15.9021	9.60938	0	0	V
0.618744	11.3443	5.28636	6.05792	5.30191	9.79498	6.9375	2	2	V
0.458724	12.4988	6.86551	5.63326	6.92627	12.4988	6.82031	0	1	V
0.21336	10.6033	6.30499	4.29832	7.00811	10.6033	10.0781	1	0	V
0.50673	14.3909	7.85858	6.53237	10.8873	14.2647	13.4062	1	1	V
0.069342	9.40042	8.60763	0.792794	8.76065	9.31796	8.83594	1	0	V
0.192024	12.2805	8.18843	4.09203	11.8901	12.2085	8.36719	1	1	V
0.176022	9.70906	6.56963	3.13944	6.56963	9.70906	7.26562	1	0	V
0.122682	9.91073	7.38855	2.52218	7.49785	9.88167	8.34375	1	1	V
0.5334	10.2662	7.11178	3.15445	10.2061	7.11178	9.84375	0	0	V
0.992124	17.0134	7.67609	9.33729	7.95144	17.0134	12.4453	3	1	V
0.656082	22.0309	8.53212	13.4987	22.0309	19.1342	12.2812	1	0	V
0.82677	19.1904	7.34528	11.8452	7.5642	18.6898	10.7109	0	1	V
0.741426	13.7304	5.75632	7.97404	5.75632	12.9852	12.3047	0	3	V
0.138684	10.5412	9.0749	1.46631	10.5412	10.4795	9.51562	1	0	V
0.197358	13.451	9.04828	4.40269	13.451	12.5355	9.04688	1	0	V
0.13335	11.3443	9.37285	1.97143	11.3443	9.99843	10.125	1	0	V
0.77343	15.1277	6.66681	8.46087	11.614	15.1277	8.0625	2	1	V
0.45339	16.7654	8.334	8.43139	16.7654	15.7164	9	1	1	V
0.682752	26.1221	6.19486	19.9273	26.1221	9.02175	6.30469	3	1	V
0.464058	12.3528	6.72581	5.62699	12.3528	6.72581	8.36719	0	0	V
0.549402	14.0981	7.34528	6.75284	7.81256	14.0981	8.53125	0	0	V
0.208026	18.1489	5.92788	12.221	5.92788	18.1489	12.6562	0	0	V
0.501396	21.0814	8.5071	12.5743	21.0814	16.328	8.74219	1	0	V
0.250698	17.8319	5.14846	12.6835	5.14846	17.8319	12.1172	0	1	V
0.288036	14.0156	7.0494	6.96616	14.0156	9.59567	8.20312	1	0	V
0.410718	11.8204	4.53767	7.28277	4.53767	11.8204	8.29688	0	1	V
0.405384	14.0156	6.2865	7.72905	13.9745	10.6033	8.60156	1	0	V
0.10668	14.7331	10.1463	4.58673	14.7331	10.2964	13.1016	1	0	V
0.10668	14.6899	9.99843	4.69142	14.6899	10.4487	13.1016	1	0	V
0.128016	12.3166	10.2662	2.05034	11.4447	12.3166	12.3516	1	0	V
0.128016	13.1386	12.0306	1.10806	13.0234	13.1001	12.9141	0	0	V
0.762762	14.561	8.76065	5.80035	14.561	12.2444	10.2891	2	0	V
0.42672	13.8519	6.70608	7.14578	13.8519	10.6345	8.71875	1	0	V
0.261366	13.7707	7.85858	5.91217	13.7707	13.4905	8.32031	1	0	V
0.389382	15.7626	6.39826	9.36438	15.4419	6.41707	8.03906	2	0	V
0.272034	14.4333	9.34537	5.08791	14.4333	9.40042	9.49219	1	0	V
0.144018	10.0869	9.6522	0.434713	10.0869	9.88167	9.79688	0	0	V
0.117348	8.70934	7.00811	1.70123	8.70934	8.53212	7.19531	1	0	V
0.144018	12.9091	10.3875	2.52159	12.9091	12.5355	10.5938	1	0	V
0.069342	10.2964	9.6239	0.672532	10.2964	9.6239	9.67969	1	0	V
0.16002	8.53212	5.17879	3.35333	5.19402	8.53212	7.03125	1	0	V
0.16002	10.6971	8.35851	2.33863	10.3875	10.6971	8.4375	1	0	V
0.090678	7.7668	6.53115	1.23565	6.53115	7.7668	7.10156	0	0	V
0.191988	14.9072	9.6522	5.25496	12.6094	14.9072	9.67969	1	0	V
0.330708	11.2448	6.74559	4.49918	11.2448	11.2118	8.53125	1	0	V
0.256032	13.9335	7.7668	6.16667	13.9335	12.2085	7.80469	1	0	V
0.117348	11.2448	5.80726	5.43751	5.80726	11.2448	7.875	0	0	V
0.517398	12.9091	11.2778	1.6313	12.066	12.2444	12.2344	1	0	V
0.421386	13.333	5.89317	7.43982	13.333	8.81226	7.59375	1	0	V
0.165354	15.0391	10.8554	4.1837	11.3443	15.0391	10.9688	2	0	V
0.575964	13.6099	6.06881	7.54111	13.6099	10.1463	6.25781	1	2	V
0.13335	13.0234	11.8204	1.20295	12.3528	13.0234	12.0469	0	0	V
0.229362	12.2085	7.99828	4.21025	7.99828	12.2085	8.20312	1	1	V
0.442722	15.4873	6.05101	9.4363	15.4873	10.0869	7.24219	1	2	V
0.394716	13.2549	10.8235	2.43135	11.0809	13.2549	11.1328	0	0	V
0.29337	13.5302	5.98034	7.54987	13.5302	12.2085	6.14062	1	1	V
0.149352	12.3528	8.43248	3.92032	12.3528	10.8554	8.64844	1	0	V
0.37338	14.3487	11.8552	2.49355	12.4988	14.3487	12.7266	2	0	V
0.549402	12.9852	7.36688	5.6183	12.9852	8.73496	8.41406	3	0	V
0.245364	13.4905	6.32353	7.167	13.4905	8.334	6.63281	1	1	V
0.405384	16.0428	11.3443	4.69857	11.3443	16.0428	12.3047	2	0	V
0.10668	14.2229	10.4795	3.74341	14.2229	13.7707	10.4062	1	0	V
0.08001	12.8335	11.7167	1.11679	12.7959	12.8335	12.4219	1	0	V
0.544068	14.7764	10.9193	3.85707	12.7959	14.7764	10.9453	1	1	V
0.176022	12.5355	8.81226	3.72327	12.5355	11.7858	9.11719	1	0	V
0.10668	12.1014	10.8873	1.21414	12.0306	12.066	11.2266	1	0	V
0.917448	14.3909	6.76543	7.62552	6.84538	14.1396	10.0312	0	1	V
0.282702	15.0833	12.0306	3.05275	12.0306	15.0833	12.9609	2	1	V
0.522732	9.53948	5.08833	4.45114	9.53948	5.84147	8.53125	1	2	V
0.474726	12.9852	10.4181	2.56709	12.9091	10.6033	10.7578	0	0	V
1.02413	16.5696	7.74402	8.82556	7.99828	15.5785	10.4531	2	0	V
0.138684	8.58238	7.32374	1.25864	7.32374	8.5071	7.19531	1	0	V
0.234696	10.4487	7.36688	3.08186	7.36688	10.4487	7.38281	0	0	V
0.192024	12.8335	7.60876	5.22477	10.9514	12.8335	8.0625	1	0	V
0.181356	11.0484	8.38309	2.66527	11.0484	10.6971	8.29688	1	0	V
0.40005	9.59567	9.15521	0.440469	9.18213	9.56753	9.75	0	0	V
0.149352	9.12836	7.21698	1.91138	7.32374	9.12836	7.57031	0	1	V
0.128016	9.37285	7.38855	1.9843	8.334	9.37285	8.20312	1	0	V
0.085344	10.4181	7.85858	2.55952	7.90487	10.4181	7.89844	1	0	V
0.544068	13.216	11.016	2.20007	12.9471	11.0484	12.7031	0	0	V
0.629412	9.48361	7.97483	1.50878	9.48361	8.1166	8.22656	0	0	V
0.208026	12.3166	7.65358	4.66299	7.65358	12.3166	8.39062	0	0	V
0.554736	11.016	7.90487	3.11108	11.016	9.0749	8.78906	1	0	V
0.698754	13.0234	7.58645	5.43693	8.14047	13.0234	7.75781	2	0	V
0.24003	13.333	7.83553	5.49745	7.85858	13.333	8.39062	0	0	V
0.496062	16.1848	10.6345	5.55033	12.8713	16.1848	10.7578	1	0	V
0.13335	13.7707	11.0484	2.72239	12.1727	13.7707	12.0234	1	0	V
0.656082	13.1386	10.6658	2.47286	11.8901	11.6481	10.8984	2	0	V
0.528066	15.2615	10.8235	4.43801	13.4905	15.2615	11.6719	1	0	V
0.645414	14.0568	7.78964	6.26713	8.78641	14.0568	7.85156	0	0	V
0.122682	18.7448	14.3487	4.39606	14.6038	18.7448	14.4844	1	0	V
0.096012	16.9635	13.4905	3.47296	13.4905	16.9635	14.7188	0	0	V
0.138684	9.31796	6.2865	3.03146	6.55036	9.31796	7.17188	1	0	V
0.672084	15.1722	7.58645	7.58572	15.1722	9.88167	11.7656	1	0	V
0.314706	20.1729	13.1386	7.03424	13.5302	15.3515	14.0859	2	0	V
0.064008	17.9897	13.9335	4.05626	13.9335	17.9897	15.3281	0	0	V
0.77343	13.8519	6.72581	7.12606	13.8519	12.7584	6.98438	1	1	V
0.421386	19.6466	11.8901	7.75658	18.0957	11.925	16.1719	1	0	V
0.85344	17.8844	9.53948	8.34489	17.8844	17.572	10.7578	2	1	V
0.117348	14.2647	11.1461	3.11858	14.2647	12.4988	11.3672	2	0	V
2.1656	8.23667	4.92658	3.31009	6.24968	5.9105	8.27344	8	0	V
0.368046	14.6038	9.04828	5.55554	14.6038	12.3166	11.5547	1	0	V
0.29337	11.2118	6.94664	4.26516	11.2118	6.94664	8.53125	1	0	V
0.144018	10.3267	8.38309	1.94362	8.40775	10.3267	8.34375	0	0	V
0.256032	14.561	11.4447	3.11633	12.066	14.561	11.7656	0	3	V
0.645414	11.2448	5.80726	5.43751	5.89317	11.2448	9.70312	0	0	V
0.944118	16.9137	7.7668	9.14695	8.26089	16.9137	8.76562	1	0	V
0.650748	18.9663	6.37949	12.5868	6.37949	18.9663	12.6797	0	2	V
0.21336	14.3909	13.2939	1.09706	14.2229	14.3909	13.875	1	1	V
0.522732	17.572	11.0484	6.52363	11.0484	17.5205	13.4766	0	1	V
0.074676	14.6038	11.1461	3.4577	12.1014	14.6038	11.2266	1	0	V
0.229362	10.7602	7.09092	3.66923	10.7602	7.09092	9.44531	0	0	V
0.282702	12.4621	7.41028	5.05183	7.95144	12.4621	10.0078	2	0	V
0.949452	14.7331	7.65358	7.07948	7.69867	13.8112	12.1641	2	1	V
0.464058	12.137	4.47152	7.66551	4.47152	8.0928	11.7656	2	0	V
0.634746	8.70934	4.76997	3.93937	8.60763	5.92788	8.74219	2	1	V
0.389382	18.7999	4.19175	14.6082	4.19175	18.7999	7.26562	0	4	V
0.192024	10.0278	4.52436	5.50348	4.52436	9.88167	8.15625	1	1	V
0.16002	15.3515	7.28085	8.07061	7.30226	15.3515	7.73438	1	0	V
0.8001	12.4988	6.37949	6.11927	8.73496	8.96891	11.625	2	0	V
0.981456	12.6094	5.58972	7.01965	5.99793	9.04828	9.14062	2	0	V
0.789432	13.9335	5.67241	8.26106	5.67241	8.55722	10.4766	2	0	V
0.18669	7.78964	5.9628	1.82684	5.9628	7.78964	7.92188	0	0	V

## Sheet: Map
Date (dd/mm/yyyy)	File	Individual name	Latitude	Longitude
2020-11-18	8	Delphinus 18.11.2020 sig.2	24.6002	-110.606
2020-11-18	9	Delphinus 18.11.2020 sig.2	24.6062	-110.585
2020-12-09	5	Delphinus 09.12.2020 sig.1	24.5227	-110.299
2020-12-09	7	Delphinus 09.12.2020 sig.1	24.5395	-110.304
2021-04-25	12	Delphinus 25.04.2021 sig.4	24.3635	-110.191
2021-04-25	8	Delphinus 25.04.2021 sig. 3	24.3956	-110.283
2021-09-07	15	Delphinus 07.09.2021 sig.4	24.3826	-110.363
2021-09-07	17	Delphinus 07.09.2021 sig.4	24.3736	-110.358
2021-09-07	20	Delphinus 07.09.2021 sig.4	24.3662	-110.359
2021-09-07	22	Delphinus 07.09.2021 sig.4	24.3597	-110.355
2021-09-07	25	Delphinus 07.09.2021 sig.4	24.3507	-110.372
